# Supplementary figures and images for: Identification of miRNA Master Regulators in Breast Cancer
Source: MDPI journal article supplement (doi:10.3390/cells9071610), 2020-07-03

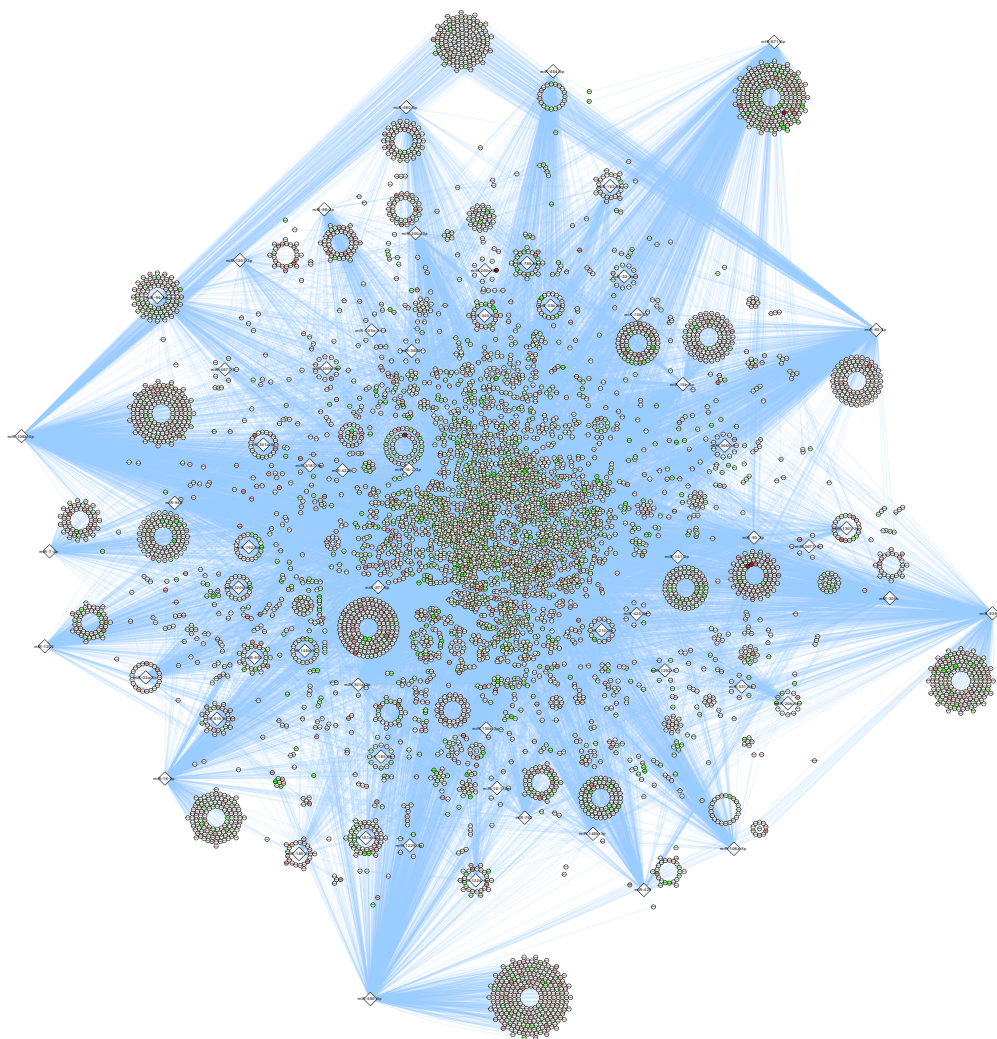

Supplement: s1 [file s1]
